# Supplementary material for: Cartilage regeneration using transforming growth factor-beta 3-loaded injectable crosslinked hyaluronic acid hydrogel
Source: Royal Society of Chemistry journal article supplement (doi:10.1039/d3bm01008b), 2023-12-13
Supplement: d3bm01008b1.pdf [file d3bm01008b1.pdf]

Biomaterials Science

## SUPPLEMENTAL MATERIAL

# Cartilage regeneration using transforming growth factor beta-3-loaded injectable crosslinked hyaluronic acid hydrogel

*Ju Hwa Lee, Pil Yun Kim, Yun Chang Pyun, Jonggyu Park, Tae Woong Kang, Jin Sol Seo, Dae  
Hoon Lee, Gilson Khang\**

Supplemental Table: 2

Supplemental Schemes: 5

Supplemental Figures: 3

## Supplemental Tables

| Experimental group            | Defect model                                                        | Transplantation materials |
|-------------------------------|---------------------------------------------------------------------|---------------------------|
| Control<br>(No-defect)        | —                                                                   | —                         |
| Sham control<br>(Only defect) | Chondral defect<br>(circular shape, diameter: 4<br>mm, depth: 2 mm) | —                         |
| HA                            |                                                                     | HA hydrogel 100 $\mu$ L   |
| HAT                           |                                                                     | HAT hydrogel 100 $\mu$ L  |

**Supplemental Table 1.** *In vivo* experimental groups, defect models, and transplantation material used for evaluating cartilage regeneration. HA, hyaluronic acid; HAT, hyaluronic acid loaded with transforming growth factor-beta 3.

(a)

| Defect model group   | Defect condition                                                                                                       |
|----------------------|------------------------------------------------------------------------------------------------------------------------|
| Chondral defect      | Circular shape, diameter: 4 mm, depth: 2 mm                                                                            |
| Osteochondral defect | Circular shape, diameter: 4 mm, depth: 2 mm<br>+ microfracture technique (circular shape, diameter: 1 mm, depth: 1 mm) |

(b)

| Experimental group         | Defect model  | Transplantation materials | Induction materials |
|----------------------------|---------------|---------------------------|---------------------|
| Control (No-defect)        | —             | —                         | —                   |
| Sham control (Only defect) | Chondral      | —                         | —                   |
| HA                         | Chondral      | HA 100 $\mu$ L            | —                   |
| HAB                        | Osteochondral |                           | BMSCs               |
| HAT                        | Chondral      | HAT 100 $\mu$ L           | —                   |
| HATB                       | Osteochondral |                           | BMSCs               |

**Supplemental Table 2.** (a) *In vivo* defect model group and (b) experimental groups for evaluation of preclinical conditions to regenerate cartilage. HA, hyaluronic acid; HAT, hyaluronic acid loaded with transforming growth factor-beta 3; HAB, bone marrow mesenchymal stem cell induction and HA transplantation; HATB, bone marrow mesenchymal stem cell induction and HAT transplantation.

Supplemental Schemes

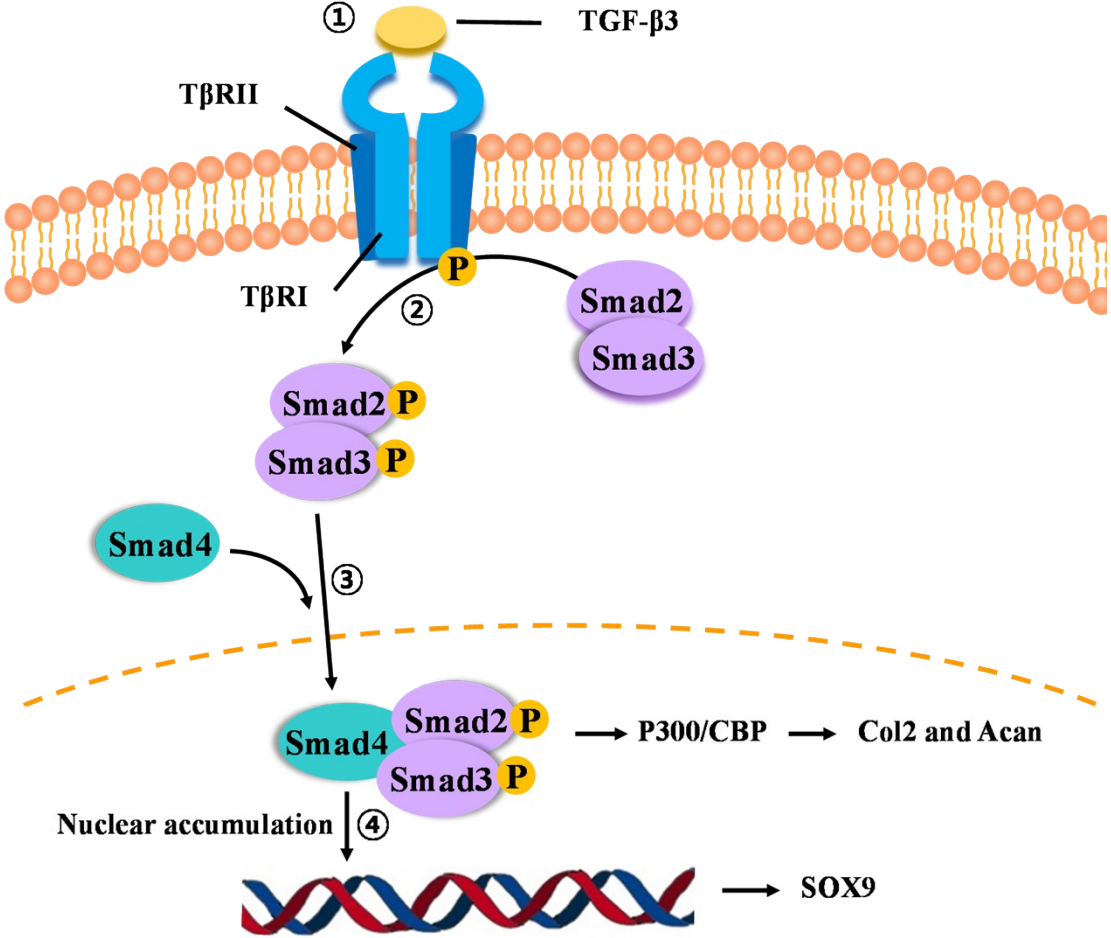

Supplemental Scheme 1. Signaling pathways and proteins involved in chondrogenic differentiation of mesenchymal stem cells through transforming growth factor-beta 3 (TGF-β3).

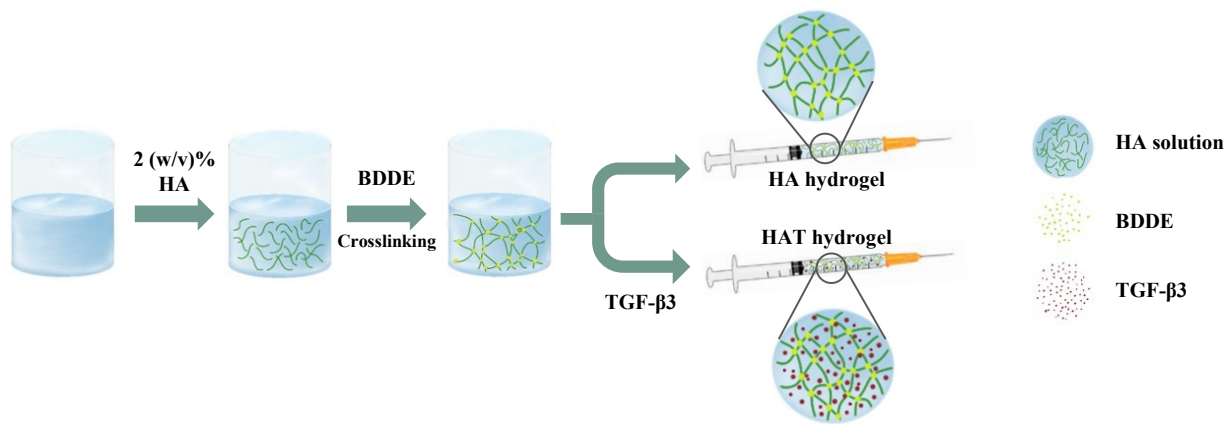

**Supplemental Scheme 2.** Schematic representation of the method used to prepare hyaluronic acid (HA) and HA gel-loaded TGF- $\beta$ 3 (HAT) gels. BDDE, 1,4-butanediol diglycidyl ether; TGF- $\beta$ 3, transforming growth factor-beta 3.

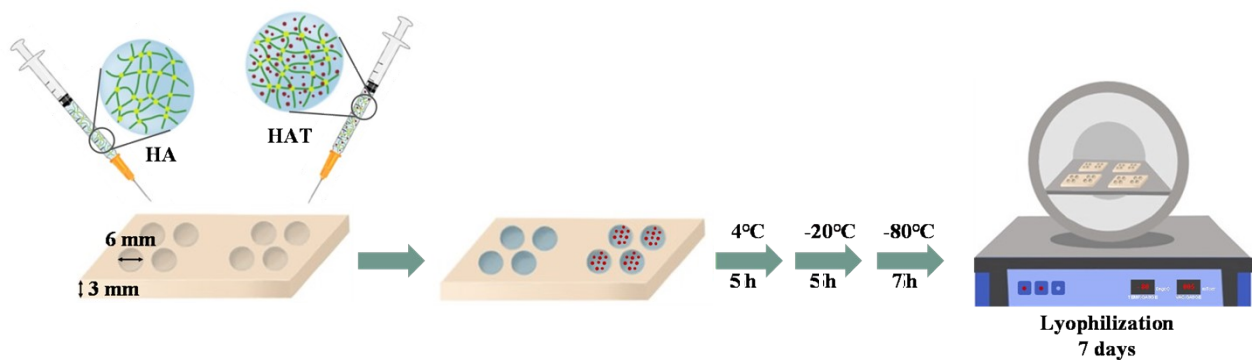

**Supplemental Scheme 3.** Preparation method of lyophilized hyaluronic acid (HA) and HA gel-loaded TGF- $\beta$ 3 (HAT) gel for SEM and sol fraction analysis. SEM, scanning electron microscope; TGF- $\beta$ 3, transforming growth factor-beta 3.



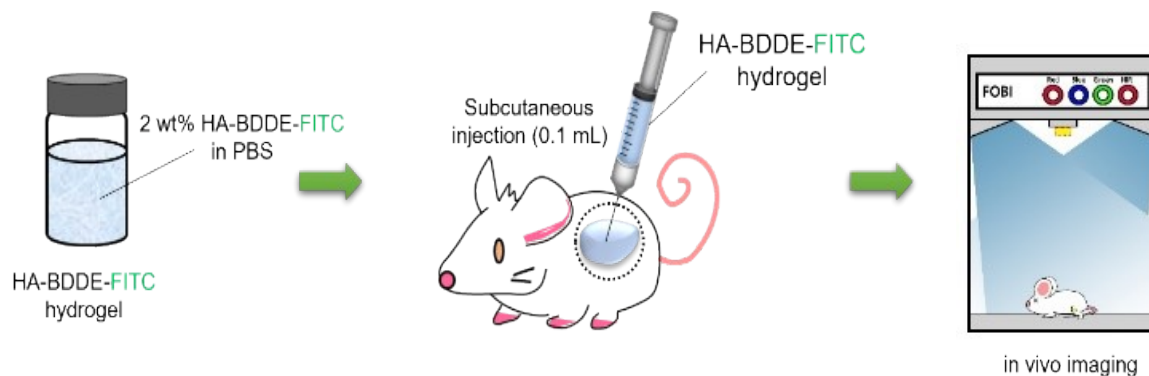

**Supplemental Scheme 5.** Schematic diagram illustrating the *in vivo* biodegradability assessment.

BDDE, 1,4-butanediol diglycidyl ether; HA, hyaluronic acid; PBS, phosphate-buffered saline

## Supplemental Figures

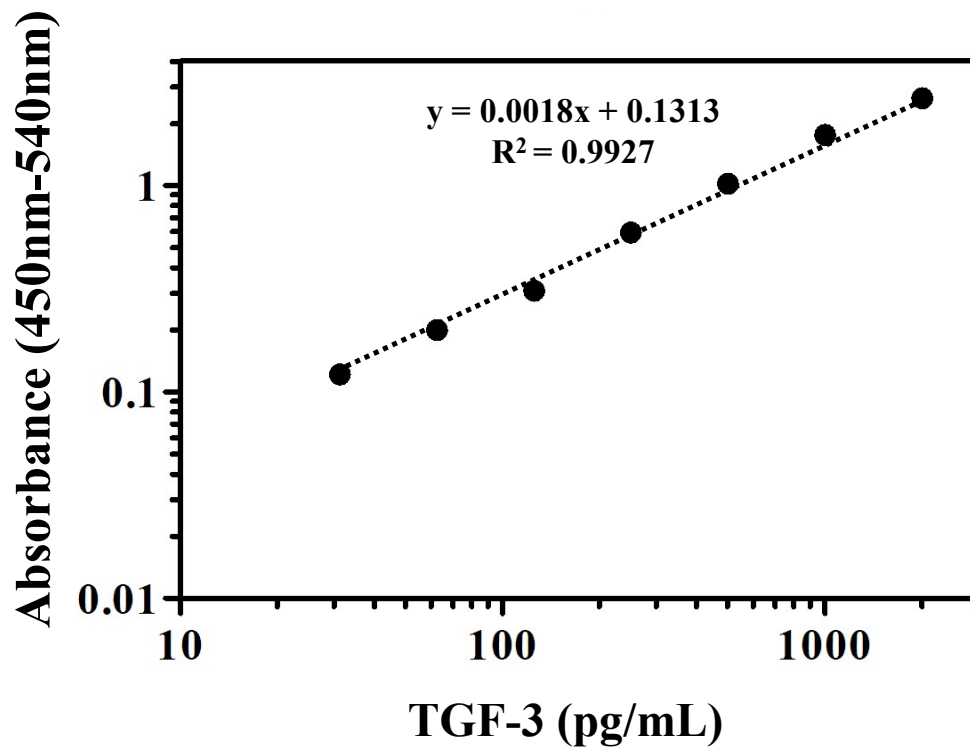

**Fig. S1.** Standard curve of TGF-β3 standard solution for the release profile analysis of TGF-β3 loaded into HA hydrogel. HA, hyaluronic acid; TGF-β3, transforming growth factor-beta 3.



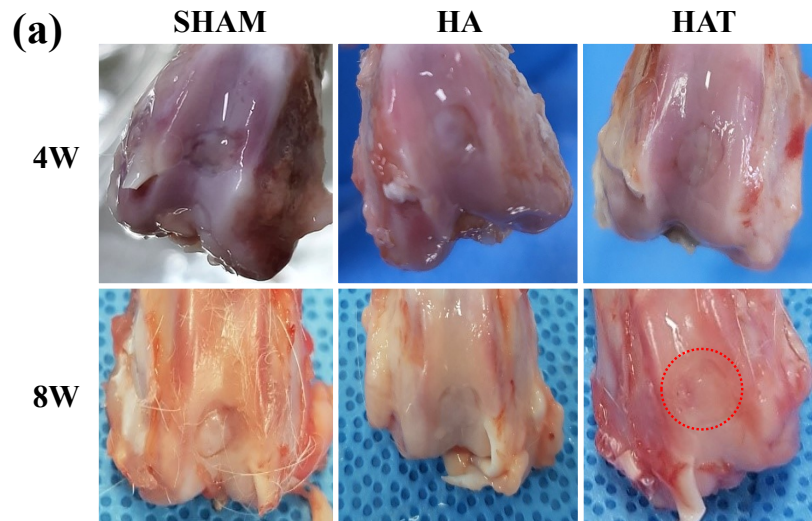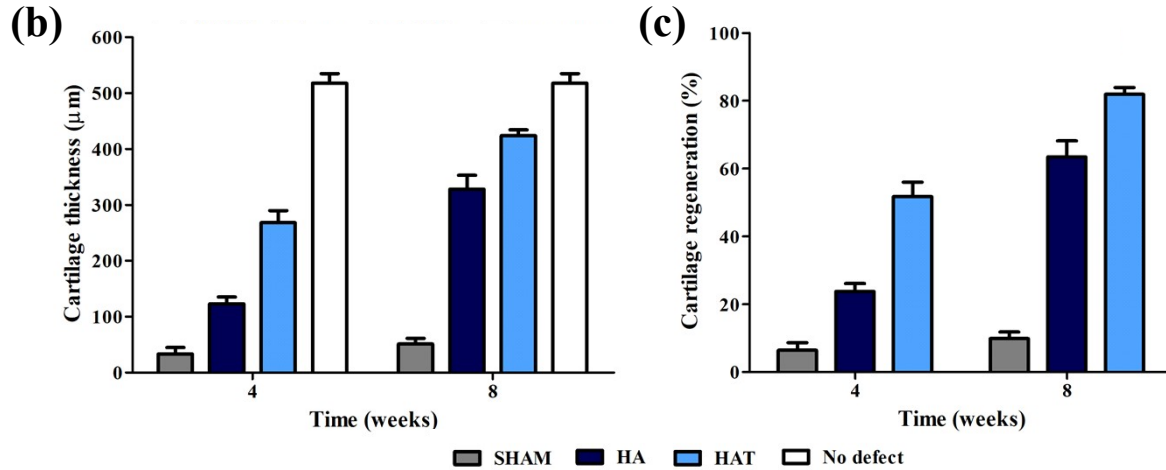

**Fig. S2.** (a) Macroscopic observation of cartilage defects in a rabbit model at 4 and 8 weeks post-transplantation. Graph showing (b) the thickness of cartilage from the subchondral bone to the surface of the cartilage and (c) the percentage of regenerated cartilage. HA, hyaluronic acid; HAT, hyaluronic acid loaded with transforming growth factor-beta 3.

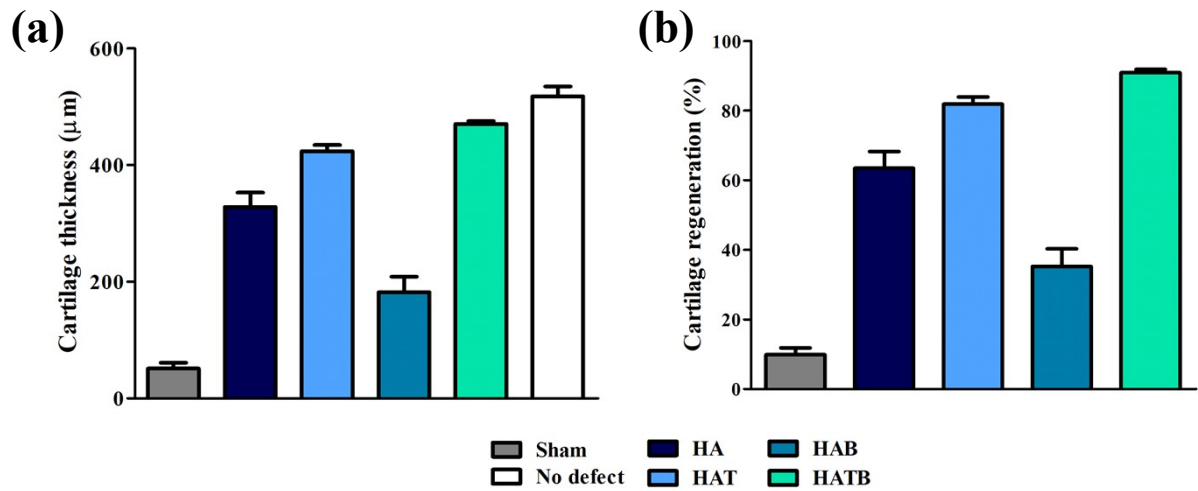

**Fig. S3.** Graph showing (a) the thickness of cartilage from the subchondral bone to the surface of the cartilage and (b) the percentage of regenerated cartilage. HA, hyaluronic acid; HAT, hyaluronic acid loaded with transforming growth factor-beta 3; HAB, bone marrow mesenchymal stem cell induction and HA transplantation; HATB, bone marrow mesenchymal stem cell induction and HAT transplantation.
